# Supplementary material
Source: HighWire-hosted journal article supplement (https://bmjopen.bmj.com/content/7/3/e013206)
Supplement: inline-supplementary-material-1 [file inline-supplementary-material-1.pdf]

**Supplementary Table S1** Demographics and laboratory findings in estimation and validation cohorts

| Variable                          | All patients (n=359) | Training set(n=181) | Validation set(n =178) | p value |
|-----------------------------------|----------------------|---------------------|------------------------|---------|
| Age (years)                       | 50.63±15.13          | 51.66 ±15.69        | 49.58 ±14.51           | 0.194   |
| Male [N (%)]                      | 198(55.2%)           | 96(53.0%)           | 102(57.3%)             | 0.417   |
| Aetiology (1/2/3/4) %             | 54.3/9.7/12.0/24.0   | 55.2/12.7/12.2/19.9 | 53.4/6.7/11.8/28.1     | 0.118   |
| WBC (×10 <sup>9</sup> /L)         | 12.9(3.1-38.4)       | 13.3 (3.1–38.4)     | 12.9 (4.2–36.8)        | 0.942   |
| Lymphocytes (×10 <sup>9</sup> /L) | 1.00 (0.17–9.40)     | 1.00 (0.20–9.40)    | 1.00 (0.17–4.80)       | 0.965   |
| Platelet (×10 <sup>9</sup> /L)    | 192 (21–548)         | 193 (27–502)        | 191.5 (21–548)         | 0.354   |
| Albumin (g/L)                     | 35.47 ±6.42          | 35.72 ±6.61         | 35.22 ±6.24            | 0.456   |
| CRP (mg/L)                        | 110 (0.7–436.5)      | 102.3 (0.8–436.5)   | 116.85 (0.7–419.4)     | 0.081   |
| Amylase (U/L)                     | 398 (13–5191)        | 501 (13–5191)       | 330 (16–4927)          | 0.238   |
| RDW (%)                           | 13.0(11.3-23.6)      | 13.1 (11.3–19.2)    | 13.0 (11.4–23.6)       | 0.421   |
| NLR                               | 11.36 (1.33–60.0)    | 11.50 (1.33–55.0)   | 11.18 (1.39–60.0)      | 0.786   |
| PNI                               | 41.05±7.72           | 41.22 ±7.74         | 40.87 ±7.71            | 0.670   |
| LMR                               | 1.43(0.22–13.33)     | 1.48 (0.24–13.33)   | 1.36 (0.22–10.00)      | 0.367   |
| Mortality [N (%)]                 | 31(8.6%)             | 17(9.4%)            | 14(7.9%)               | 0.607   |

Continuous variables are presented as mean±SD or median (range).

p value was training set versus validation set.

Aetiology (1/2/3/4)%, 1, 2, 3, and 4 represent gallstone, alcohol, hypertriglyceridemia, and other aetiologies, respectively.

WBC, white blood cell count; CRP, C-reactive protein; RDW, red cell distribution width; NLR, neutrophil-lymphocyte ratio; LMR, lymphocyte-monocyte ratio; PNI, prognostic nutritional index.
